# Supplementary material
Source: PubMed Central journal article supplement (PMC5607632)
Supplement: NIHMS874406-supplement-2.pdf [file NIHMS874406-supplement-2.pdf]

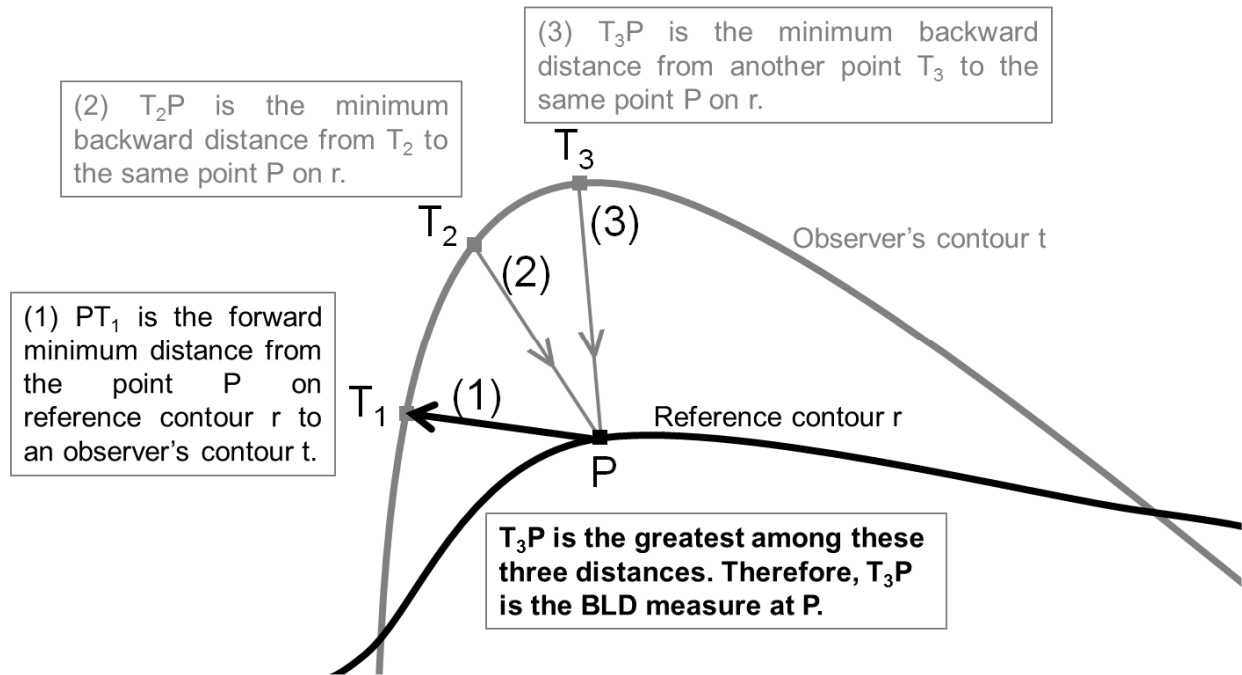

Figure S2: An illustration of obtaining bidirectional local distance (BLD) at a point  $P$  representing a voxel on reference contour surface  $r$  (black curve).  $PT_1$  is the forward minimum distance from  $P$  to an observer's contour surface  $t$  (gray curve).  $T_2P$  is the minimum backward distance from  $T_2$  to the same point  $P$ .  $T_3P$  is the minimum backward distance from another point  $T_3$  to the same point  $P$ . Since  $T_3P$  is the greatest among these distances, i.e.,  $T_3P > PT_1$  and  $T_3P > T_2P$ , it is established as the BLD measure at  $P$  in this example. Backward minimum distances from a number of points  $T_j$  on contour  $t$  to contour  $r$  can be obtained at  $P$ . If no backward minimum distances to  $r$  can be identified at  $P$ , then the forward minimum distance, i.e. MD from  $P$  is established as the BLD measure.
