# Supplementary material
Source: PubMed Central journal article supplement (PMC5607632)

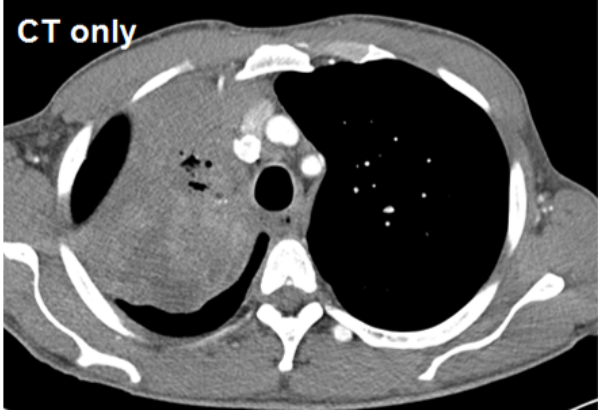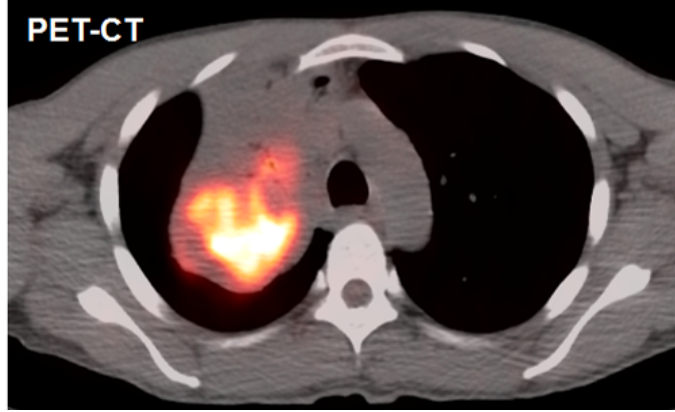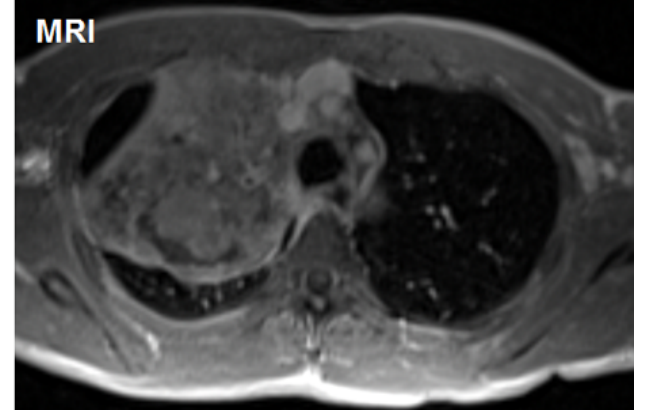

Supplement: NIHMS874406-supplement-1.pdf [file NIHMS874406-supplement-1.pdf]
